# Loss of Llgl1 in retinal neuroepithelia reveals links between apical domain size, Notch activity and neurogenesis

Brian S. Clark<sup>1,\*</sup>, Shuang Cui<sup>1,\*</sup>, Joel B. Miesfeld<sup>1</sup>, Olga Klezovitch<sup>2</sup>, Valeri Vasioukhin<sup>2</sup> and Brian A. Link<sup>1,†</sup>

## SUMMARY

To gain insights into the cellular mechanisms of neurogenesis, we analyzed retinal neuroepithelia deficient for Llgl1, a protein implicated in apicobasal cell polarity, asymmetric cell division, cell shape and cell cycle exit. We found that vertebrate retinal neuroepithelia deficient for Llgl1 retained overt apicobasal polarity, but had expanded apical domains. Llgl1 retinal progenitors also had increased Notch activity and reduced rates of neurogenesis. Blocking Notch function by depleting Rbpj restored normal neurogenesis. Experimental expansion of the apical domain, through inhibition of Shroom3, also increased Notch activity and reduced neurogenesis. Significantly, in wild-type retina, neurogenic retinal progenitors had smaller apical domains compared with proliferative neuroepithelia. As nuclear position during interkinetic nuclear migration (IKNM) has been previously linked with cell cycle exit, we analyzed this phenomenon in cells depleted of Llgl1. We found that although IKNM was normal, the relationship between nuclear position and neurogenesis was shifted away from the apical surface, consistent with increased pro-proliferative and/or anti-neurogenic signals associated with the apical domain. These data, in conjunction with other findings, suggest that, in retinal neuroepithelia, the size of the apical domain modulates the strength of polarized signals that influence neurogenesis.

**KEY WORDS:** Neurogenesis, Notch, Zebrafish, Lethal giant larvae, Shroom3, Interkinetic nuclear migration, Cell polarity

## INTRODUCTION

Early in retinal development, neuroepithelial progenitor cells of the optic cup divide in either a symmetric proliferative mode, where both daughter cells remain mitotic, or in a neurogenic mode, where at least one daughter cell exits the cell cycle and differentiates as a neuron. Although the signaling pathways and transcriptional networking involved in retinal neurogenesis are beginning to be understood, less is known about the cell biological mechanisms that regulate this transition. However, analyses of invertebrates and vertebrates have revealed several cellular processes important for regulating neurogenesis. Cellular mechanisms include the asymmetric distribution of fate determinants between daughter cells, such as signaling proteins or transcription factors (Sawa, 2010). More general components, such as centrioles, sub-types of endosomes, proteasomes and apical or basal membranes can also be asymmetrically distributed and affect cell fates (Willardsen and Link, 2011). In addition, cellular activities, such as the length of the cell cycle of the progenitor or the dynamics of the primary cilia, have also been shown to influence the mode of cell division in progenitor cells (Lee and Gleeson, 2010; Salomoni and Calegari, 2010). Although these data support roles for specific cellular components or activities in regulating the symmetry of daughter cell fates, less is known about how progenitor cells are selected to produce post-mitotic neurons initially.

Recent studies, however, have demonstrated an important role for interkinetic nuclear migration (IKNM) and polarized signals in regulating neurogenesis within the retina (Baye and Link, 2008;

Latasa et al., 2009). IKNM is the process in which neuroepithelial nuclei oscillate from the apical to basal surface and in phase with the mitotic cycle. In the zebrafish retina, for example, the depth of nuclear migration correlates with the probability that the next cell division will be neurogenic (Baye and Link, 2007). Within the retina, IKNM is facilitated primarily by the activity of actomyosin, but is also influenced by microtubule motors (Del Bene et al., 2008; Norden et al., 2009; Yu et al., 2011). For example, in *dynactin1a* mutants, the depth of nuclear migration is augmented and the retinal neuroepithelia show a higher proportion of neurogenic divisions. The relationship between nuclear position and neurogenesis depends on apicobasal cell polarity (Baye and Link, 2007), and mutations in a variety of genes essential for apicobasal cell polarity affect neurogenesis (Yamaguchi et al., 2010). The role of IKNM on neurogenesis is important in structures other than zebrafish retina, as experimental manipulations that alter IKNM in mouse cortical neuroepithelia affect cell cycle exit and generation of neurons (Ge et al., 2010; Schenk et al., 2009; Tsai et al., 2005; Xie et al., 2007; Zhang et al., 2009). Furthermore, computational analysis of rat retinal progenitors implicated IKNM, among other parameters, as important for predicting neurogenic and cell-type fate decisions (Cohen et al., 2010). Although the Notch pathway has been proposed as a potential mediator for how patterns of IKNM might influence neurogenesis (Del Bene et al., 2008; Murciano et al., 2002), specific mechanisms have remained unexplored. Insights to the cellular mechanisms that might regulate selection of neurogenic divisions have been gained by the study of factors that are known to regulate the candidate cellular processes introduced above. For example, analysis of Lethal giant larval proteins, primarily in invertebrates, has provided insight into the regulation of cell polarity, actomyosin dynamics and cell cycle exit.

The *lethal 2 giant larvae* locus [*l(2)gl* in *D. melanogaster*] was first identified in *Drosophila* as homozygous mutations caused neoplastic tumors in larval imaginal discs and later in the maturing

<sup>1</sup>Department of Cell Biology, Neurobiology and Anatomy, Medical College of Wisconsin, Milwaukee, WI 53226, USA. <sup>2</sup>Division of Human Biology, Fred Hutchinson Cancer Research Center, Seattle, WA 98109, USA.

\*These authors contributed equally to this work

†Author for correspondence (blink@mcw.edu)

brain (Mechler et al., 1985). The *l(2)gl* gene encodes a conserved protein comprised of WD40 repeats in the N-terminal half and an 'Lgl-domain' that makes up the C-terminal half. Studies demonstrated that L(2)gl regulates various aspects of apicobasal cell polarity in numerous tissues (Vasioukhin, 2006; Yamanaka and Ohno, 2008). For example in many epithelia, L(2)gl and the vertebrate homologues Lgl1 and Lgl2, are essential for maintenance of apical cell junctions (Bilder et al., 2000; Hutterer et al., 2004; Yamanaka et al., 2003).

In other cell types, loss of *l(2)gl* results in distinct apicobasal polarity defects. For example, *Drosophila* neuroblasts deficient for *l(2)gl* show defects in targeting protein determinants to subcellular domains and in regulating mitotic spindle orientations (Albertson and Doe, 2003; Peng et al., 2000). Mutant neuroblasts frequently produce two self-renewing progenitors as opposed to wild-type cells that produce one progenitor and one ganglion mother cell, thus resulting in a hyperproliferation phenotype (Lee et al., 2006). In zebrafish lateral line precursor cells, knock down of Lgl1 or Lgl2 function blocks constriction of apical actin belts and subsequent deposition of neuromasts (Hava et al., 2009). In addition, Lgl proteins are required for internalization of apical membrane and proteins during depolarization in MDCK cells (Yamanaka et al., 2006). In *penner/lgl2* zebrafish mutants, epidermal cells overproliferate and the formation of basally located hemidesmosomes is prevented. The eye disc cells in *Drosophila l(2)gl* mutants also show hyper-proliferation, but, owing to residual maternal L(2)gl protein, observable apicobasal polarity is spared (Grzeschik et al., 2007). Finally, in mouse cortical neuroepithelia, targeted gene disruption of *Lgl1* results in loss of apical junction maintenance and reduced cell cycle exit (Klezovitch et al., 2004). Excessive proliferation was attributed to failure to asymmetrically segregate Numb, a negative regulator of the Notch pathway. Overall, these studies have shown that Lgl proteins are linked to various aspects of apicobasal cell polarity and can regulate cell cycle exit. In this study, we explore the function of Lgl1 in retinal development and its role in the subcellular organization of neuroepithelial cells, and the influence of Lgl1 on the relationship between IKNM and neurogenesis.

## MATERIALS AND METHODS

### Zebrafish transgenic lines

The following lines were used: Tg(*hsp70:shrm3DN:ires:mCherry*)<sup>mw21</sup> (this study); Tg(*h2afx:prom11b-GFP*)<sup>mw22</sup> (this study); Tg(*h2afx:h2afv-mCherry*)<sup>mw3</sup> (McMahon et al., 2009); Tg(*atoh7:GFP*)<sup>rw021</sup> (Masai et al., 2003); Tg(*h2afv:h2afv-GFP*)<sup>kca6</sup> (Pauls et al., 2001); Tg(*her4:dRed*)<sup>knu2</sup> (Yeo et al., 2007); Tg(*her4:GFP*)<sup>y83</sup> (Yeo et al., 2007); Tg(*tp1-MmHbb:d2GFP*)<sup>mw43</sup> (this study; based on Parsons et al., 2009).

### Morpholinos

The following morpholino oligonucleotides were synthesized by GeneTools (Philomath, OR): *lgl1* ATG MO1, 5'-CCGTCTGAACCT-AACTTCATCATC-3' (Hava et al., 2009); *lgl1* UTR MO2, 5'-TGAAGCCGAATCAGAGGTAAATCAC-3' (Hava et al., 2009); *tp53* MO, 5'-GCGCCATTGCTTTGCAAGAATTG-3' (Robu et al., 2007); *rbpj* ATG MO, 5'-CAAACCTCCCTGTCAACAGGCGC-3' (Ohata et al., 2011); *atoh7* ATG MO1, 5'-TTCATGGCTCTTCAAAAAAGTCTCC-3' (Pittman et al., 2008); and control MO, 5'-CCTCTTACCTCA-GTTACAATTATA-3'.

### Antibodies

The following antibodies were used: phospho(ser10)histone3 [rabbit polyclonal, 1:1000, Upstate Biologicals (Lake Placid, NY, USA), Cat#06-570];  $\beta$ -catenin [mouse monoclonal, 1:500, BD Biosciences (San Jose, CA, USA), Cat#610153]; syntaxin 4 [rabbit polyclonal, 1:400, Chemicon-Millipore (Temecula, CA, USA), Cat#AB5330]; aPKC- $\zeta$  C20 (Prkci

[rabbit polyclonal, 1:1000, Santa Cruz Biotechnology (Santa Cruz, CA, USA), Cat#SC-216]; BrdU [rat monoclonal, 1:1000, Harlan Sera Labs (Leicestershire, UK) Cat#MAS-250]; Ki67 [goat polyclonal, 1:30, Santa Cruz Biotechnology, Cat#SC-7846]; phospho(ser19)-myosin regulatory light chain (pMRLC) [rabbit polyclonal, 1:100, Cell Signaling Technology (Danvers, MA, USA), Cat#3671L]; Crb2a/Zs4 antigen [1:20, University of Oregon Monoclonal Antibody Facility (Hsu and Jensen, 2010)]; Lgl1 [rabbit polyclonal, 1:1000 (this study)]; and Lgl1 (frog) [rabbit polyclonal, 1:2000 for western blotting (Dollar et al., 2005)].

### BrdU/Ki67 analysis

Assays for cell proliferation and cell cycle exit using BrdU/Ki67 was performed as previously described (Baye and Link, 2007; Klezovitch et al., 2004).

### Time lapse imaging

Maximum basal nuclear position and cell cycle period during IKNM was quantified as previously described (Baye and Link, 2007).

### Blastulae transplantation

Blastulae transplantation was performed as previously described to generate chimeric embryos (Carmany-Rampey and Moens, 2006).

### Heat shock-mediated transgene induction

Heat shock was carried out at the following developmental times and intervals: 22 hpf for 30 minutes; 28 hpf for 30 minutes; 30 hpf for 40 minutes. For each heat-shock, fish were placed in 15 ml polypropylene tubes and were transferred to a waterbath at 37°C. Between heat-shocks, embryos were transferred back to Petri dishes and returned to a 28.5°C incubator. At 32 hpf, embryos were scored for expression of the *ires:mCherry* transgene and processed as described in the text.

## RESULTS

### Isolation of zebrafish Lgl1

To begin studies of Lgl1 in zebrafish retinal neurogenesis, we isolated a full-length cDNA. Predicted translation of zebrafish *lgl1* showed that it shares high homology to Lgl1 from other vertebrates with significant, but less homology to Lgl2 (Fig. 1A). Nearly exact conservation was found in the region containing the stretch of serine residues that serve as phosphorylation sights for Prkci (Fig. 1A) (Betschinger et al., 2003; Plant et al., 2003). Expression analysis indicated that *lgl1* message was abundant in the eyes and developing central nervous system (CNS) during the period of neurogenesis. Message levels were diminished as differentiation progressed (Fig. 1B). In zebrafish, retinal progenitor cells begin to leave the cell cycle at 28 hpf (hours post fertilization) and the central retina is nearly all post-mitotic by 72 hpf (Hu and Easter, 1999). Consistent with mRNA expression, Lgl1 immunoreactivity was found in the proliferative retinal neuroepithelium in a punctate manner along the basolateral plasma membranes (Fig. 1D, left). Expression of fusions between green fluorescent protein and Lgl1 (GFP-Lgl1) showed more uniform basolateral membrane localization (Fig. 1D, right). Basolateral membrane location is typical for most cells that express Lgl proteins, including neuroepithelia (Afonso and Henrique, 2006). We did not detect Lgl1 immunoreactivity or GFP-Lgl1 in apical crescents of dividing cells or in nuclei, as has been shown for *Drosophila* neuroblasts and oocyte follicular epithelia, respectively (Albertson and Doe, 2003; Dollar et al., 2005).

### Knock down of Lgl1 results in eye defects

We next used antisense oligonucleotides (morpholinos, MOs) to knock down Lgl1 in zebrafish embryos. Injection of *lgl1* MOs resulted in embryos with smaller eyes, reduced brain size and moderate heart defects (supplementary material Fig. S1). Although

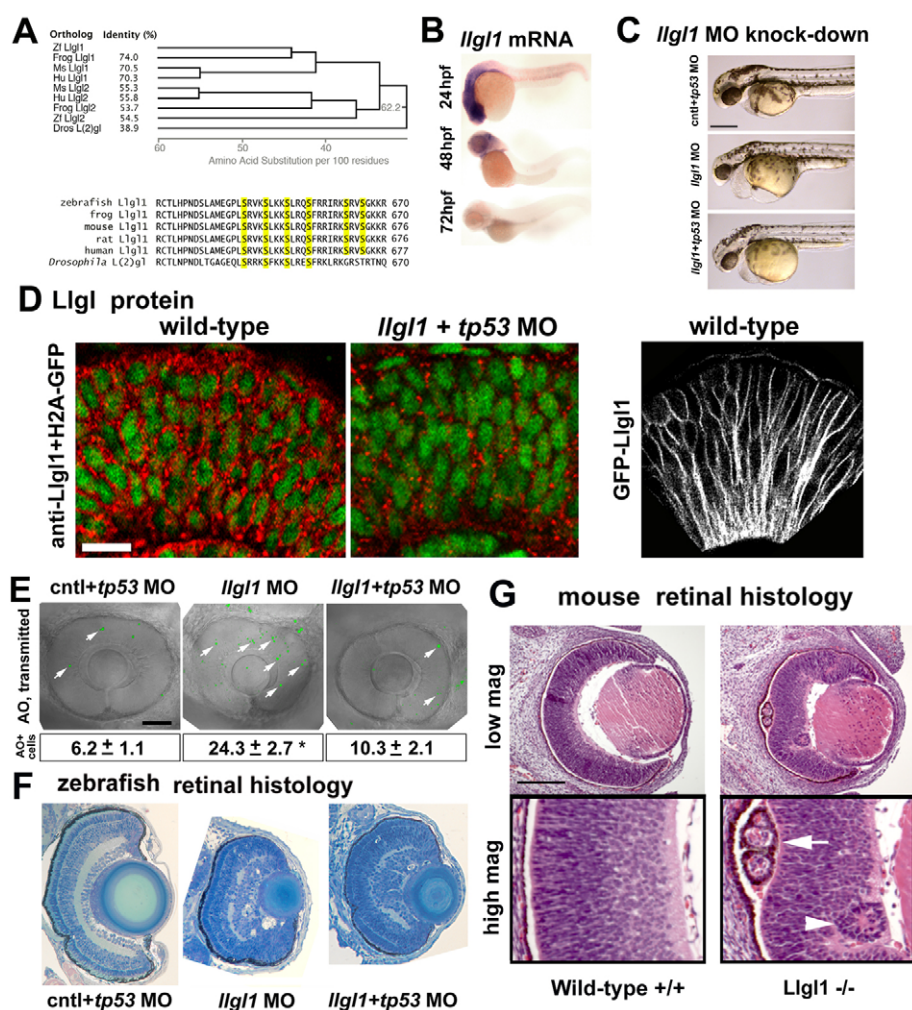

**Fig. 1. Loss of *Llgl1* disrupts retinal development.** (A) Phylogenetic comparison of *Llgl1* proteins showing percentage identity (left, top) and cladogram when compared with zebrafish *Llgl1* (right, top). Sequence comparison (bottom) showing conservation of serines known to be phosphorylated. (B) In situ hybridization of *lgl1* mRNA in zebrafish embryos at 24, 48 and 72 hours post-fertilization (hpf). (C) Side views of morphant embryos at 36 hpf: 8 ng control+ 8 ng *tp53* morpholino (MO) (top); 8 ng *lgl1* ATG MO (middle); 8 ng *tp53* + 8 ng *lgl1* ATG MO (bottom). (D) Localization of *Llgl1* immunoreactivity (red puncta) in 32 hpf retina of H2A-GFP (green nuclei) transgenic embryos (left) or those injected with 8 ng *tp53* + 8 ng *lgl1* ATG MO (middle). Localization of fluorescence in 32 hpf retina of wild-type embryos injected with 100 pg GFP-*Llgl1* mRNA (right). (E) Sagittal images of eyes in living embryos stained with Acridine Orange (AO) (green puncta, arrows) to label dying cells: 8 ng control+ 8 ng *tp53* morpholino (MO) (left); 8 ng *lgl1* ATG MO (middle); 8 ng *tp53* + 8 ng *lgl1* ATG MO (right). Average number of Acridine Orange-positive cells per eye±s.e.m. (50 µm confocal optic section) (bottom). For each condition,  $n=10$  eyes from 10 embryos were quantified. \* $P<0.001$  (Student's  $t$ -test). (F) Retinal histology of eyes from 80 hpf zebrafish embryos: 8 ng control+ 8 ng *tp53* morpholino (MO) (left); 8 ng *lgl1* ATG MO (middle); 8 ng *tp53* + 8 ng *lgl1* ATG MO (right). (G) Retinal histology of eyes from E15.5 day mice: wild type (left panels) and *Llgl1* homozygous mutant (right panels). Note the rosettes in the retinal pigment epithelium (arrow) and neural retina (arrowhead). Scale bars: 250 µm in C; 20 µm in D; 100 µm in E-G.

these phenotypes are shared with mutants for other polarity genes (*prkci/has*, *mpp5a/nok*, *epb4115/moe*), the majority of *lgl1* morphants did not show significant body curvature or ocular hypopigmentation, which are hallmarks of polarity mutants (Cui et al., 2007; Horne-Badovinac et al., 2001; Jensen and Westerfield, 2004; Wei and Malicki, 2002). To address whether the small eyes and brains of *lgl1* morphants may be caused by cell death, we co-injected morpholinos against *tp53*, which has been shown to abrogate apoptosis (Robu et al., 2007). Knockdown of *lgl1* with *tp53* MOs or in a *tp53* mutant background (Berghmans et al., 2005) partially rescued eye and brain size (Fig. 1C). Quantitatively, the number of acridine orange-positive cells in *lgl1* morphant retinas was reduced when *tp53* was also deleted (Fig. 1E). In addition to

cDNA rescue controls for these *lgl1* MOs, we assessed *Llgl1* immunoreactivity in morphant eyes and found a reduction, but not total absence, of retinal *Llgl1* (Fig. 1D; supplementary material Fig. S2). Similarly, western blot analysis showed significant, but incomplete, depletion of *Llgl1* in morphants (Hava et al., 2009) (supplementary material Fig. S2). Together, these data are consistent with perdurance of maternal *Llgl1* protein, which is resistant to MOs that target mRNAs. A large supply of *Lgl* maternal protein has also been shown for *Drosophila* (Grzeschik et al., 2007). The *tp53*-mediated cell death caused by *lgl1* MOs might be due to either off-target effects and/or a specific role of *Llgl1* in neuronal survival. We favor a specific role in neuronal survival, however, based on the similarities between the *lgl1* MO and



mouse *Lgl1* knock-out phenotypes as described below (Fig. 1F,G). As our goal was to investigate loss of *Lgl1* function to gain insights into the cell biological regulation of neurogenesis, all subsequent analyses using *lgl1* MOs was carried out with *tp53* co-depletion so that neurogenesis could be studied without the complications of increased cell death. Histological analysis of *lgl1* morphants revealed a delay in retinal lamination and local disorganization (Fig. 1F; supplementary material Fig. S1). To confirm the specificity of these phenotypes and address vertebrate conservation, we analyzed eyes of the *Lgl1* knockout mice (Klezovitch et al., 2004). Like zebrafish *lgl1* morphants, the retina of *Lgl1* knockout mice showed delayed lamination and cellular rosettes (Fig. 1G).

### Loss of *Lgl1* reduces cell cycle exit of retinal progenitor cells

The morphological features in retinas depleted of *Lgl1* are consistent with a hyperproliferation defect in the neuroepithelial progenitors. To address this possibility, we conducted phosphohistoneH3 (PH3) immunostaining on control and *lgl1* MO-injected embryos (Fig. 2A,B). PH3 immunoreactivity labels cells in late G2/M-phase and therefore marks a subset of the proliferating cells. Analysis showed a trend towards increased cell proliferation with loss of *Lgl1* (Fig. 2C). By labeling cells with Histone2B-GFP and monitoring nuclear dynamics from mitosis to mitosis, we did not measure a significant difference in the cell cycle period of control versus *lgl1* morphant cells (Fig. 2D). Both assays showed cell divisions were confined to their normal location at the apical surface. Because PH3 immunoreactivity labels only a small proportion of the total proliferative cells, we next performed BrdU

experiments to better quantify potential defects in cell cycle exit. BrdU labeling from either 34–46 hpf or from 48–60 hpf, revealed *lgl1* morphants had significantly higher proportions of proliferative cells (Fig. 2E–G). We performed a similar assay to calculate the proportion of cells that exited mitosis from E14.5 to E15.5 in wild-type and *Lgl1*<sup>−/−</sup> mice. Using BrdU, in combination with Ki67 immunoreactivity, which marks proliferative cells throughout the cell cycle, we found that the proportion of cells exiting the cell cycle was significantly reduced in *Lgl1*<sup>−/−</sup> retinal neuroepithelia. Overall, these data indicate that loss of *Lgl1* in retinal neuroepithelia biases progenitors to re-enter the cell cycle, without altering the cell cycle period.

### Apicobasal polarity is intact in retinal neuroepithelia following loss of *Lgl1*

Because apical junctions in many cell types are disrupted following depletion of *Lgl* proteins, we investigated these structures in zebrafish *lgl1* morphant and mouse *Lgl1*<sup>−/−</sup> mutant retinal neuroepithelia. Apicobasal markers in retinal neuroepithelia were correctly positioned in both zebrafish and mice depleted of *Lgl1* (Fig. 3A–H; data not shown). Markers included *Prkci*, which depends on *Lgl1* function for apical localization in other cell types, as well as *Stx4a*, which has been shown to directly interact with *Lgl2* (Musch et al., 2002; Rolls et al., 2003; Yamanaka et al., 2003). Inspection of the apical junction markers, however, indicated that the spacing between junctions was expanded following loss of *Lgl1*. We confirmed these observations using transmission electron microscopy (Fig. 3I,J; supplementary material Fig. S3). In both control and *lgl1* morphants, polarized features of the neuroepithelial cells were maintained, including the

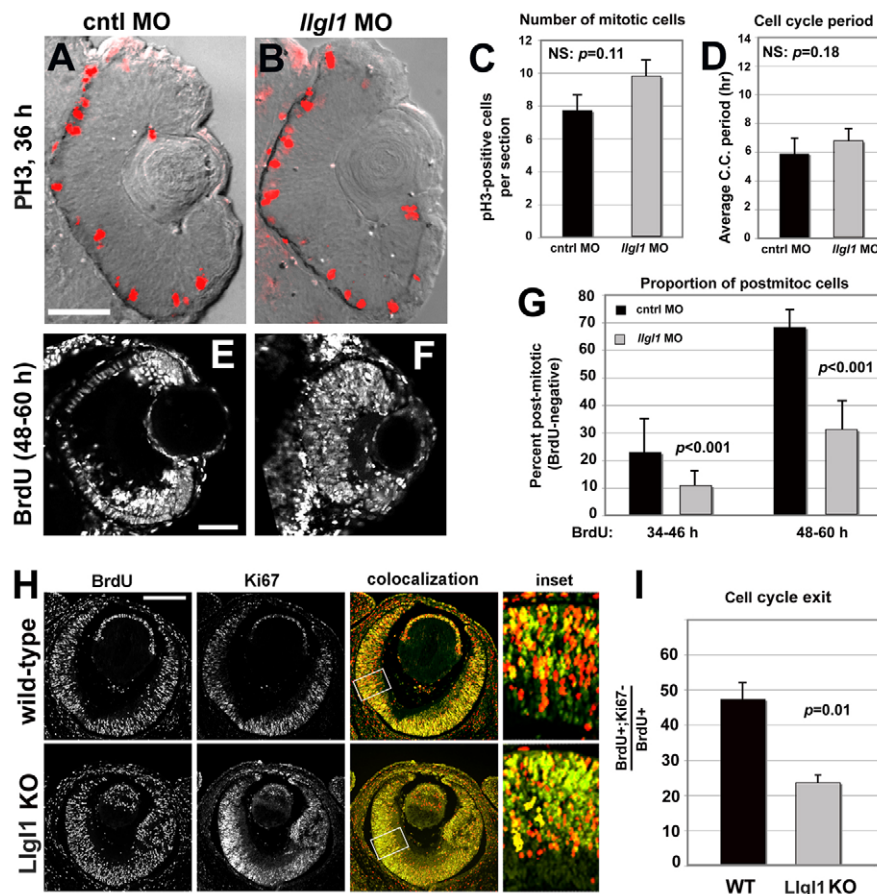

**Fig. 2. Loss of *Lgl1* disrupts cell cycle exit in retinal progenitor cells.** (A,B) Phosphohistone3 (PH3) immunoreactivity in zebrafish eyes of 36 hpf (A) wild-type and (B) *lgl1* MO (8 ng) embryos. (C) Comparison of the number of PH3-positive mitotic cells between control (black bar) and *lgl1* morphant (gray bar) zebrafish embryos ( $n=12$  eyes analyzed for each condition). (D) Comparison of the cell cycle period between control (black bar) and *lgl1* morphant (gray bar) zebrafish embryos ( $n=25$  cells each from four control MO or five *lgl1* MO embryos). (E,F) Retinal sections from 60 hpf wild-type (E) or *lgl1* morphant (F) zebrafish showing BrdU labeling starting at 48 hpf. (G) Comparison of the proportion of BrdU-negative (post-mitotic cells) per section between control (black bars) and *lgl1* morphant (gray bars) zebrafish embryos ( $n=10$  retina analyzed for each condition). BrdU was injected from 34–46 hpf (left) or from 48–60 hpf (right). (H) BrdU labeling [red (E14.5–E15.5)] and Ki67 (green) immunoreactivity with colocalization (yellow) and high-magnification inset for wild-type and *Lgl1* homozygous mutant mice. (I) Comparison between wild-type (black bar) and *Lgl1* homozygous mutant mice (gray bar) for the percentage of retinal cells that had exited the cell cycle between E14.5 and E15.5 (proportion of BrdU-positive; Ki67-negative of the total number of BrdU-positive cells). For each genotype, six eyes from three embryos were quantified. For C,D,G,I, error bars represent s.e.m.;  $P$ , Student's  $t$ -test; NS, not significant. Scale bars: 100  $\mu$ m in A,B,H; 50  $\mu$ m in E,F.

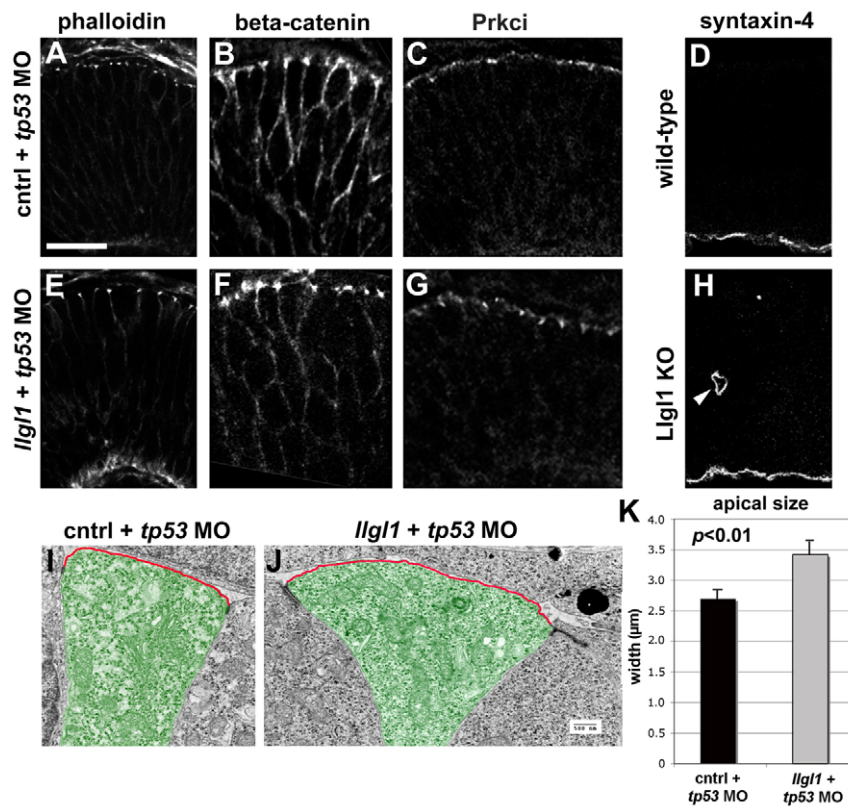

**Fig. 3. Apicobasal polarity is maintained in *Lgl1*-deficient retinal neuroepithelia.**

(A-C,E-G) Immunostaining for apical junction markers in 36 hpf zebrafish retina: (A,E) rhodamine-phalloidin; (B,F)  $\beta$ -catenin; (C,G) Prkci. For the apical markers, zebrafish were injected with either 8 ng control+ 8 ng *tp53* MO (A-C) or 8 ng *tp53* + 8 ng *Lgl1* ATG MO (E-G). (D,H) Immunostaining for the basal marker syntaxin 4 in wild-type (D) or *Lgl1* mutant (H) E15.5 mouse retina. Note the basal staining in a rosette in H (arrowhead). (I,J) Transmission electron micrographs of zebrafish retinal neuroepithelial cells injected with either 8 ng control+ 8 ng *tp53* MO (I) or 8 ng *tp53* + 8 ng *Lgl1* ATG MO (J). The apical membrane above the electron-dense adherens junctions is highlighted (red outline). Individual cells are pseudo-colored green for contrast. (K) Comparison of the average length of apical membrane between control (black bar) and *Lgl1* morphant (gray bar) cells. Scale bars: 25  $\mu$ m in A-H; 500 nm in I,J.

apical localization of adherens junctions, Golgi apparatus and centrosomes. Although electron-dense adherens junctions were localized apically in *Lgl1* morphants, the junctions did appear enlarged and more diffuse (Fig. 3J; supplementary material Fig. S3). Although primary cilia were difficult to find in retinal neuroepithelia in general when compared with those in the forebrain, both control and *Lgl1* morphants displayed these apical structures (data not shown). Also consistent with light microscopy, inspection of electron micrographs suggested expansion of the apical domain in *Lgl1* morphants. Quantification of the cellular area above adherens junctions indicated that *Lgl1* morphant cells indeed had enlarged apical domains (Fig. 3K).

Phosphorylated (active) non-muscle myosin II can mediate apical domain constriction and has been shown to physically interact with Lgl proteins (Sawyer et al., 2009; Strand et al., 1995). We therefore assessed localization of the phosphorylated regulatory subunit of myosin II (pMRLC). In control retinal neuroepithelia, pMRLC localized to the apical region and to perinuclear puncta, which have been previously shown to be associated with cells undergoing rapid interkinetic nuclear migration (Norden et al., 2009; Leung et al., 2011). In *Lgl1* morphant retinas, perinuclear pMRLC-staining was not changed, but there was a reduction in immunoreactivity at the apical domain, as assessed by colocalization with the apical domain marker Crumbs2a (Crb2a – Zebrafish Information Network) (supplementary material Fig. S4).

### Cell-autonomous expansion of the apical domain in *Lgl1* morphants

The apical domain of *Lgl1* morphants might have been affected by changes in cell shape, owing to altered cell density. To address this possibility and investigate the cell autonomy of *Lgl1* morphant phenotypes, we generated genetic mosaics through blastulae transplantation (Carmany-Rampey and Moens, 2006). Donor cells

were injected at the one-cell stage with the lineage-tracing probe, Alexa488-dextran and either *Lgl1*+*tp53* MO or control+*tp53* MO (Fig. 4A). Donor blastulae cells were then transferred to unlabeled wild-type host cells. At 34 hpf, chimeric embryos were fixed and stained with rhodamine-phalloidin to mark actin belts associated with apical junctions and define the apical surfaces of retinal neuroepithelial cells (Fig. 4B). Quantification of the apical area of control versus *Lgl1* morphant cells revealed that the apical domain was expanded with the loss of *Lgl1* (Fig. 4C). Neither the total surface area nor the height of *Lgl1* morphant cells were, however, significantly different from control cells (Fig. 4D; supplementary material Fig. S5). Together, these data indicate that apical domain expansion in retinal neuroepithelia is a cell-autonomous feature of *Lgl1* depletion.

### Retinal neurogenesis is attenuated in *Lgl1* morphants

We next used a similar genetic mosaic assay to investigate the consequences of depleting *Lgl1* on retinal neurogenesis. Donor cells were derived by mating carriers of the *Tg(h2afx:h2afv-mCherry)<sup>mw3</sup>* and *Tg(ato7:GFP)<sup>rw21</sup>* transgenes, which mark all progenitor nuclei in red fluorescence and neurogenic progenitors with cytoplasmic green fluorescence (Masai et al., 2003; McMahon et al., 2009). Expression of the *ato7:GFP* transgene (previously called *ath5:GFP*) initiates during the last cell cycle preceding a neurogenic division and is maintained in a subset of post-mitotic retinal neurons (Poggi et al., 2005). Donor clusters were tracked at 26 hpf with the onset of *ato7* expression, at 36 hpf midway though *ato7*-dependent neurogenesis, and at 60 hpf when *ato7* neurogenesis was complete. Initiation of neurogenesis occurred normally in *Lgl1* morphant cells. However, by 36 hpf, control cell clusters had on average 57% *ato7:GFP*-positive cells, whereas *Lgl1* morphant cell clusters showed 32% *ato7:GFP*-positive cells.



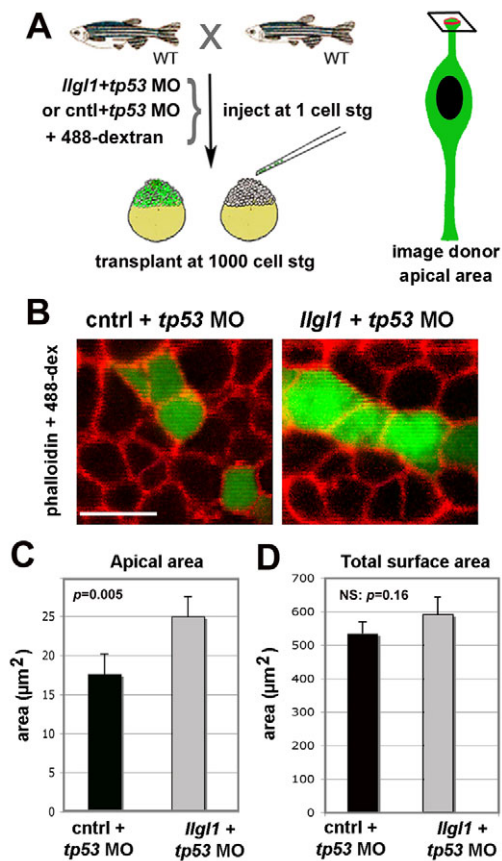

**Fig. 4. Apical domain expansion in *Llg1*-deficient retinal neuroepithelia.** (A) Schematic showing the experimental design for evaluating apical domain of morphant retinal neuroepithelia in wild-type host eyes. (B) Confocal image of the apical surface area of retinal neuroepithelial endfeet. Donor cells (green) were derived from embryos injected from either 8 ng control+ 8ng *tp53 MO* (left) or 8 ng *tp53* + 8ng *Llg1* ATG MO (right). Chimeric embryos were fixed at 34 hpf and stained for rhodamine-phalloidin (red). (C) Comparison of the apical surface area between control (black bars) and *Llg1* morphant (gray bars) cells ( $n=22$  cells each from six control MO or 5 *Llg1* MO chimeras). (D) Comparison of the total surface area between control (black bars) and *Llg1* morphant (gray bars) cells ( $n=25$  cells each from three control MO or three *Llg1* MO retinas). For D and E, error bars represent s.e.m.;  $P$ , Student's  $t$ -test;  $NS$ , not significant. Scale bar: 10  $\mu m$  in B.

The defect in neurogenesis was maintained through 60 hpf (Fig. 5C). The expansion of apical domain and concomitant reduction in cell cycle exit and neurogenesis raised the issue of whether, in wild-type retina, the apical domain is smaller in neurogenic progenitors when compared with proliferative progenitors. To address this issue, we analyzed the apical area of *atoh7*:GFP-positive neurogenic cells versus non-GFP cells during the initiation of retinal neurogenesis in wild-type transgenic embryos (Fig. 5D-G; supplementary material Movie 1). This was accomplished by monitoring the apical domain in live *atoh7*:GFP transgenic embryos. The apical domain was marked by RFP-UtrCH, which localizes to apical junctions based on the F-actin binding domain of Utrophin (Burkel et al., 2007). Like that described for the mammalian cortex (Kosodo et al., 2004), neurogenic progenitors in zebrafish retina showed smaller apical domains (Fig. 5H). With this analysis, we also found that while the apical domain varied between cells, for individual progenitors there were minimal

changes throughout the cell cycle, until just before entry into M phase when the cell rounded (supplementary material Movies 2, 3).

To investigate whether *Atoh7* function itself modulated apical domain size, we analyzed this feature in embryos where *Atoh7* translation was blocked. As previously observed, *atoh7* morpholinos efficiently inhibited retinal ganglion cell genesis up to 72 hpf (Pittman et al., 2008). However, at earlier developmental times, loss of *Atoh7* did not affect the size of the apical domain (supplementary material Fig. S6).

### Experimental expansion of apical domain reduced neurogenesis

These results suggest that the size of the apical domain in retinal neuroepithelial cells might influence neurogenic decisions, and is not simply a consequence of a neurogenic fate. To explore this possibility further, experiments were conducted to expand the apical domain of retinal neuroepithelia, without manipulating *Llg1*, which potentially regulates apical domain size and neurogenesis through independent mechanisms. Previous work has demonstrated that disruption of Shroom3 protein activity results in expansion of apical area without affecting overall apicobasal cell polarity (Haigo et al., 2003; Hildebrand, 2005; Lee et al., 2007). We generated a transgenic line that expresses a dominant-negative version of zebrafish Shroom3 (*Shrm3DN*). In this line, *Shrm3DN* is expressed by the inducible heat-shock 70 promoter (*hsp70*) and the cells are marked by mCherry fluorescent protein (Fig. 6A). We also generated a transgenic line in which GFP is fused with Prominin1b (*Prom1b-GFP*), a cholesterol-interacting pentaspan membrane protein that is enriched at the apical region of polarized cells, including retinal neuroepithelia (Fig. 6B) (Corbeil et al., 2010). Embryos produced by crossing fish from these two lines were heat shocked to induce *Shrm3DN* protein and the localization of *Prom1b-GFP* was then evaluated. Similar to frog neural plate cells expressing a comparable *Shrm3DN* protein (Lee et al., 2007), retinal neuroepithelial cells appeared shortened and the apical domain was expanded. Overall apicobasal polarity, however, was maintained (Fig. 6B). To evaluate better the apical domain in *Shrm3DN*-expressing neuroepithelia, transmission electron microscopy was employed. Cells expressing *Shrm3DN* showed enlarged apical domains, in which membrane often bulged above the adherens junctions (Fig. 6D; supplementary material Fig. S3). As in *Llg1* depleted cells, the adherens junctions themselves of *Shrm3DN* cells were also larger. Consistent with marker studies, apical features of these neuroepithelial cells were preserved at the ultrastructural level, including location of the adherens junctions, centrosomes and the Golgi (Fig. 6C,D; supplementary material Fig. S3). Expansion of the apical domain in *Shrm3DN*-expressing cells was quantified and confirmed as cell-autonomous in a genetic mosaic assay (Fig. 6E,F). Interestingly, in mosaics, donor cell height was not altered by *Shroom3* inhibition (supplementary material Fig. S7). When the mosaic assay was conducted using *shrm3DN*; *atoh7*:GFP transgenic cells as donors, we found that similar to *Llg1* morphants, neurogenesis was reduced (Fig. 6G-I). Experimental reduction of apical domain size was attempted by expressing full-length *Shroom3*. However, transient activation at the start of retinogenesis resulted in a strong delamination phenotype of neuroepithelia, precluding a meaningful analysis of neurogenesis. As neither *Shroom3* nor *Llg1* proteins are thought to regulate directly the transcriptional aspects of neurogenesis, these observations suggest that the size of apical membrane

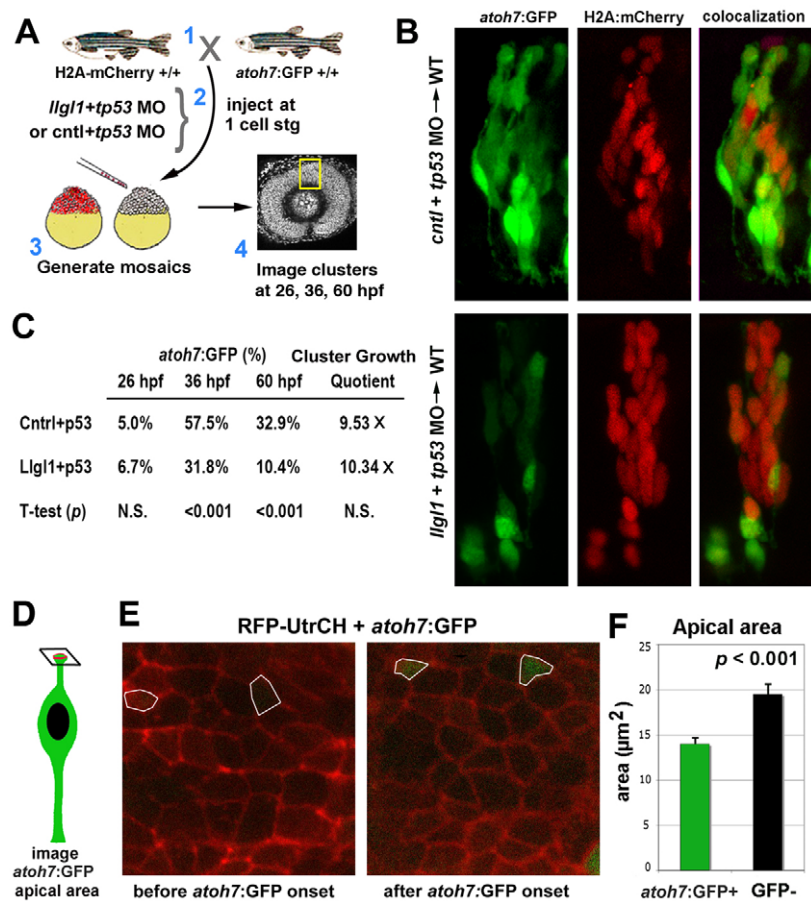

**Fig. 5. Neurogenesis is reduced in Lgl1-deficient retinal neuroepithelia.** (A) Experimental design for evaluating neurogenesis in morphant retinal cells in wild-type host eyes. (B) Confocal images of donor cells showing atoh7:GFP (green, left panels), H2A-mCherry (red, middle panels) and combined images (right panels) at 36 hpf. Donor cells were derived from embryos injected with either 8 ng control + 8 ng tp53 MO (top) or 8 ng tp53 + 8 ng lgl1 ATG MO (bottom). (C) Comparison of the proportion of atoh7:GFP-positive cells in control or lgl1 morphant clusters (n>10 clusters from 10 chimeras for each condition) tracked at 26, 36 and 60 hpf. Cluster Growth Quotient indicates the fold expansion of the cluster cell number [(60 hpf cell number - 26 hpf cell number) / 26 hpf cell number]. (D) Image plane used to measure apical area. (E) Confocal images of retinal neuroepithelial apical domains prior to atoh7:GFP expression (segmented areas, left) and just after GFP became detectable (right). Apical junctions are labeled by injection of RFP-UtrCH mRNA (red) (F) Comparison of the apical area of cells prior to atoh7:GFP (green bars, n=21 cells) expression and cells that did not go on to express GFP (black bars, n=35 cells). Error bars represent s.e.m.; P, Student's t-test.

influences this cell fate. We addressed this possibility by analyzing whether neurogenic signals, which are associated with the apical domain, were affected in either lgl1 morphant or Shrm3DN transgenic fish.

### Notch activity is increased with expansion of the apical domain and is required for reduced neurogenesis

Previous studies have shown that, in retinal neuroepithelia, cells with apical nuclei show increased expression of Notch target genes (Cisneros et al., 2008; Del Bene et al., 2008; Murciano et al., 2002). This suggests that the apical region of neuroepithelia is enriched for Notch activity, potentially through a variety of mechanisms. For example, in *Drosophila*, Notch receptor proteins are specifically associated with the apical domain of neuroepithelia (Genevet et al., 2009; Maitra et al., 2006; Vaccari and Bilder, 2005). However, localizing endogenous full-length Notch proteins has been elusive for vertebrates. To investigate whether expansion of the apical domain in retinal neuroepithelia altered Notch activity, we analyzed expression of the *her4*:dRed or *tp1*:d2GFP transgenes following disruption of either Lgl1 or Shroom3. Her4 is a direct target of Notch activity and the transgenic line functions as a sensitive reporter for Notch activity in the nervous system (Yeo et al., 2007). The *tp1* promoter consists of 12 Rbpj-binding sites and reports Notch activity throughout the embryo (Parsons et al., 2009). We found that transiently overexpressing Shrm3DN protein, using an *hsp70*:Shrm3DN:*ires*:GFP construct, resulted in acute autonomous elevations of Notch activity (Fig. 7A-F). Confocal images indicated that the increased Notch activity remained enriched at the apical region of the neuroepithelium, although the

polarized levels of expression was less obvious than control transgenic or non-transgenic cells. Pixel intensity measurements showed a 2.5-fold increase in both reporters following inhibition of Shroom3 (Fig. 7C,F). Similarly, knockdown of lgl1 resulted in upregulation of multiple Notch target genes and downregulation of neurogenic genes, as judged by real-time quantitative RT-PCR (supplementary material Fig. S8).

To test whether increased Notch activity was essential for the reduced neurogenesis following Lgl1 depletion, Rbpj morpholinos were employed (Ohata et al., 2011). In the atoh7:GFP genetic mosaic assay, knockdown of Lgl1 again showed reduced neurogenesis. However, co-depletion of Lgl1 and Rbpj resulted in control proportions of atoh7:GFP-positive cells in donor clusters (Fig. 7G). Potentially, Notch activity itself may have caused the expansion of the apical domain following loss of Lgl1. To test this, we expressed a constitutive active Notch1 protein (GFP-Notch1ΔE) in retinal neuroepithelia. This mutant version of Notch1 lacks part of the extracellular domain and is constitutively susceptible to γ-secretase activity and shows strong gain of Notch activity (Coffman et al., 1993). In GFP-Notch1ΔE-expressing cells, neurogenesis was reduced, but the apical domain was not expanded (supplementary material Fig. S9). Interestingly, the Notch fusion protein showed preferential localization within the apical region. Together, these data indicate that elevated Notch activity is a consequence, and not a cause, of an expanded apical domain and nuclear Notch signaling is required for the neurogenic defects with loss of Lgl1.

In a final set of experiments, we analyzed whether loss of Lgl1, and the concomitant expansion of the apical domain and Notch activity, affected the relationship of nuclear position and



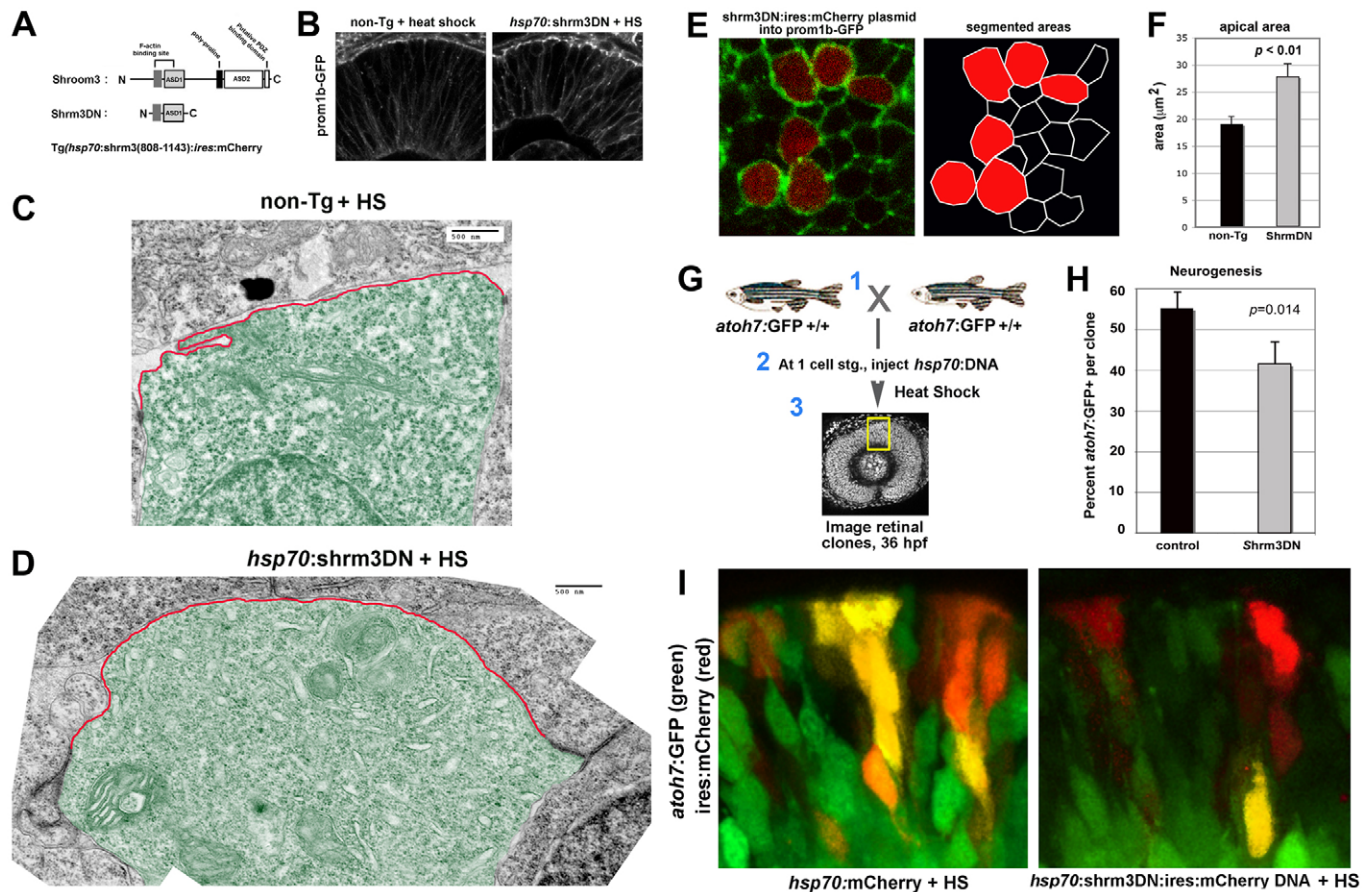

**Fig. 6. Inhibiting Shroom3 expanded the apical domain and reduced neurogenesis in retinal neuroepithelia.** (A) Schematic showing modular organization of wild-type vertebrate *Shroom3* and the dominant-negative (*Shrm3DN*) version. (B) Localization of *prom1b*-GFP in non-transgenic and *Shrm3DN* transgenic retina following heat shock (HS). (C,D) Transmission electron micrographs of 32 hpf retinal neuroepithelial cells from (C) non-transgenic and (D) *Shrm3DN* transgenic retina following heat shock. The apical membrane above the electron-dense adherens junctions is highlighted (red outline). Individual cells are pseudo-colored green for contrast. (E) Confocal image (left panel) of the apical retinal surface of 32 hpf *prom1b*-GFP (green) transgenic embryos injected with *shrm3DN:ires:mCherry* plasmid (red). Segmentation of the confocal image, used for quantification, is shown in the right panel. (F) Comparison of the apical area between *Shrm3DN*-positive cells (gray bars, *n*=20 cells, three embryos) and *mCherry*-negative cells (black bars, *n*=20 cells, three embryos). (G) Schematic showing the experimental design for evaluating neurogenesis in *Shrm3DN*-expressing cells in wild-type host eyes. (H) Comparison of the proportion of *atoh7*:GFP-positive cells in *mCherry*-positive clusters with either *hsp70:mCherry* (black bars) or *hsp70:shrm3DN:ires:mCherry* (gray bars)-injected plasmid (for each condition, *n*=10 clusters, 10 embryos). (I) Examples of clusters expressing either *hsp70:mCherry* (red, right) or *hsp70:shrm3DN:ires:mCherry* (red, left) in a *atoh7*:GFP background (green cells) following heat shock (HS). For F and H, error bars represent s.e.m.; *P*, Student's *t*-test. Scale bars: 500 nm in C,D.

neurogenesis. During interkinetic nuclear migration in the zebrafish retina, cells with nuclei that migrate to more basal positions are biased to produce neurons in the next division (Baye and Link, 2007). Measuring the maximum basal nuclear position within control or *llgl1* morphant cells of *atoh7*:GFP transgenic embryos showed that a polarized relationship between nuclear position and neurogenesis was maintained following loss of *Llgl1* (Fig. 7H). Furthermore, the overall range of maximum nuclear positions was not significantly altered, indicating that interkinetic nuclear migration itself was not affected. However, cells that normally would have divided neurogenically based on their maximum nuclear position, remained proliferative following loss of *Llgl1* (Fig. 7D). These data suggest that *Llgl1* disruption affects retinal neurogenesis initially not by altering overall apicobasal cell polarity, but instead by increasing the apical domain and neurogenic signals, such as Notch, that are associated with this region (Fig. 7I,J).

## DISCUSSION

In this study, we explored the loss-of-function phenotypes of *Llgl1* in zebrafish and mouse retinal neuroepithelia to gain insight into the cellular mechanisms that influence neurogenesis. In these cells, we found that reduction of *Llgl1* resulted in expansion of the apical domain and enlargement of the apical junctions, but did not disrupt overall apicobasal polarity. The lack of overt depolarization could potentially be due to inefficient knockdown of *Llgl1*, presence of maternal protein or compensation by *Llgl2*. Indeed, mutations in zebrafish *llgl2* also do not show classic polarity phenotypes, which have been attributed to maternal protein and/or compensation by *Llgl1*. Instead, *llgl2* (*penner*) mutants show disruption to apicobasal features, including expanded apical surface and loss of basal hemidesmosomes, as well hyperproliferation of epidermis (Reischauer et al., 2009; Sonawane et al., 2005; Sonawane et al., 2009). With regard to *Llgl1* morphants and mutants, despite overtly normal polarity, neurogenesis was affected and retinal progenitor



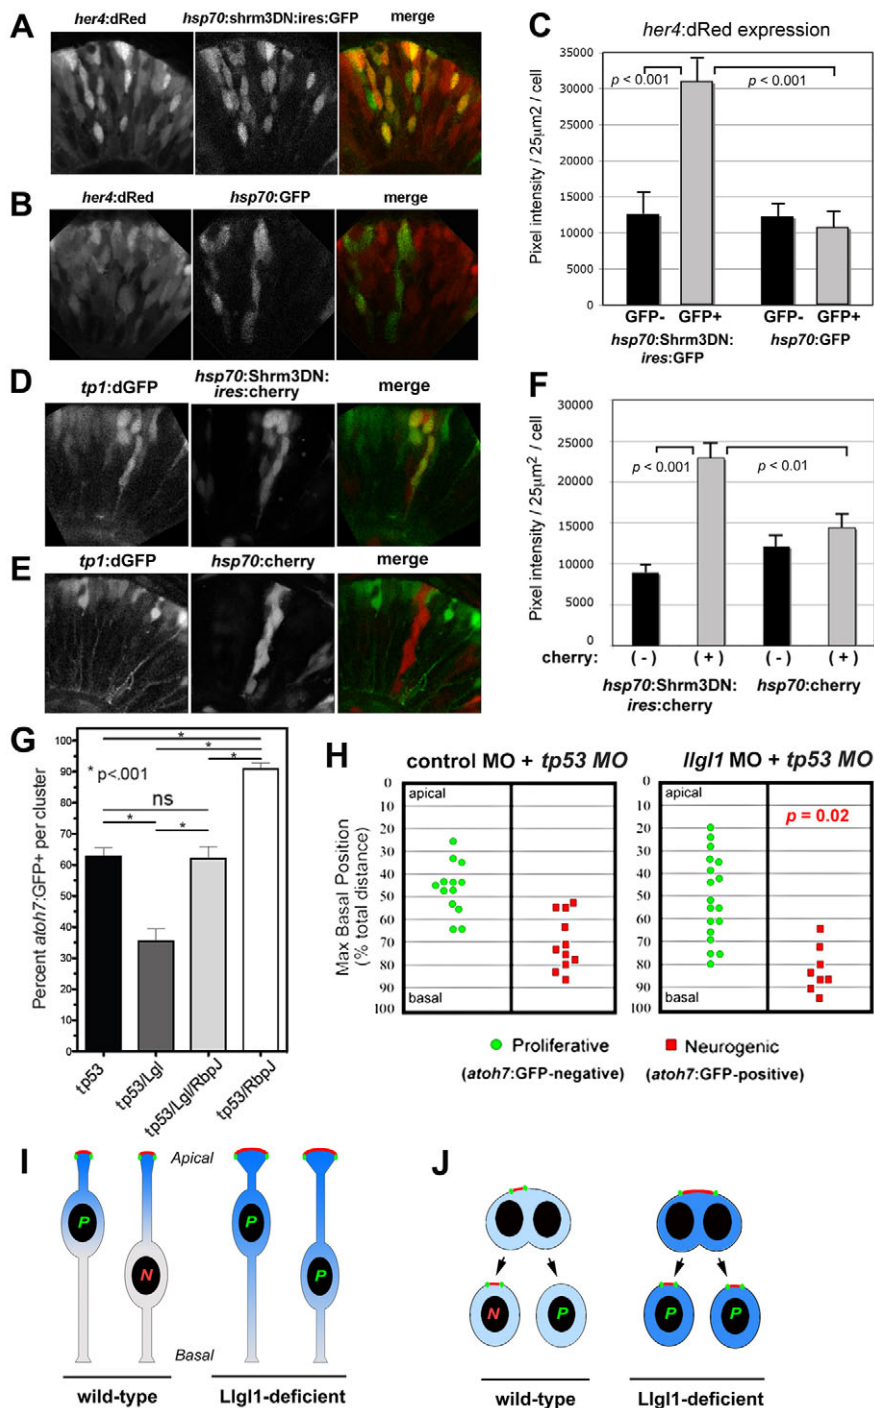

**Fig. 7. Augmented Notch signaling is required for reduced neurogenesis with loss of Lgl1.** (A,B) Retinal expression of *her4:dRed* in 36 hpf embryos injected with plasmid DNA for *hsp70:Shrm3DN:ires:GFP* (A) or *hsp70:GFP* (B). (C) Pixel intensity measurements comparing *her4:dRed* expression in *hsp70:Shrm3DN:ires:GFP*-positive ( $n=58$ ) and -negative ( $n=162$ ) or *hsp70:GFP*-positive ( $n=72$ ) or -negative ( $n=138$ ) cells. (D,E) Retinal expression of *tp1:d2GFP* in 36 hpf embryos injected with plasmid DNA for (D) *hsp70:Shrm3DN:ires:mCherry* or (E) *hsp70:mCherry*. (F) Pixel intensity measurements comparing *tp1:d2GFP* expression in *hsp70:Shrm3DN:ires:GFP*-positive ( $n=73$ ) and -negative ( $n=73$ ) or *hsp70:GFP*-positive ( $n=66$ ) or -negative ( $n=70$ ) cells. Error bars in C and F represent s.e.m.;  $n$  equals total number of cells quantified from more than three embryos for each condition;  $P$ , Student's  $t$ -test. (G) Percentage of cells within an *atoh7:GFP*-donor cluster that express GFP at 36 hpf. The morpholino condition is listed under each bar: 8 ng *tp53* MO; 8 ng *tp53* + 8 ng *lgl1* ATG MO; 8 ng *tp53* + 8 ng *rbpj* MO; 8 ng *tp53* + 4 ng *rbpj* MO. For each condition,  $n=12$  clusters were scored from 12 chimeras.  $P$ , one-way ANOVA following Tukey's post-hoc test; ns, not significant. (H) Maximum basal nuclear position during interkinetic nuclear migration in retinal donor cells that expressed *atoh7:GFP* (green) or remained GFP negative (red) from donor embryos injected with either 8 ng control + 8 ng *tp53* MO (left) or 8 ng *tp53* + 8 ng *lgl1* ATG MO (right). Maximum nuclear position is significantly different for neurogenic progenitors in control versus *lgl1* morphants;  $P$ , Wilcoxon Rank Sum Test. (I) Schematic model showing neuroepithelial cells undergoing nuclear migration. Wild-type cells with basal nuclei become neurogenic progenitors. In *Lgl1*-deficient cells, the apical domain (red) is expanded and the apical-associated signals (blue gradient) are increased, causing cells with basal nuclei to divide as proliferative progenitors. (J) Schematic model showing neuroepithelial cells undergoing cytokinesis. Divisions that differentially partition the apical membrane drive asymmetric fates, whereas divisions that equally segregate the apical domain result in symmetric fates. Cells with larger apical domains, such as with *Lgl1* deletion, may tend to partition this domain equally.

cells re-entered the cell cycle in higher proportions than wild-type cells. Our additional experiments and previous reports suggest that the size of the apical domain and associated junctions influences neurogenesis. First, in wild-type cells, neurogenic progenitors had smaller apical domains – an observation previously made for mammalian cortical progenitor cells (Kosodo et al., 2004). Second, transient expansion of the apical domain by inhibition of Shroom3 activity also inhibited neurogenesis in retinal neuroepithelia. Mechanistically, either loss of *Lgl1* or inhibition of Shroom3 in these cells increased Notch activity, which is known to maintain the progenitor state and can block neurogenesis. Indeed, Notch activity was found to be essential for the altered neurogenesis with loss of

*Lgl1*. Interestingly, *Lgl1* morphants showed normal interkinetic nuclear migration. However, *Lgl1*-deficient progenitors that had nuclei move deep towards the basal side often remained proliferative. This contrasts with wild-type cells with similar maximum basal nuclear positions, which nearly always became neurogenic. Overall, these data suggest that in retinal progenitors, pro-proliferative and/or anti-neurogenic signals are associated with the apical membrane and junctions, and the size of this region modulates signaling activity. The strength of apically localized activities in part regulates the selection of neurogenic progenitors based on proximity of the nucleus to the apical region and/or the inheritance of this domain between daughter cells (Fig. 7I,J).

The shift in the relationship between nuclear position and neurogenesis following loss of *Lgl1* implies that apical domain-associated signals act acutely and in collaboration with nuclear position to modulate neurogenesis. In other words, the fate decision to produce a post-mitotic daughter is determined rapidly in the progenitor cell itself. However, our data do not exclude a role for apical domain inheritance and associated signals/determinants in also modulating cell fate decisions within the daughter cells. For example, apical domain distribution may determine whether neurogenic divisions produce one neuron and a progenitor cell or two neurons. Alternatively, apical domain partitioning may also regulate the specific cell type fate of daughter cells. In invertebrates, asymmetric partitioning of regulator factors is a well-established mechanism for cell fate determination (Sawa, 2010). Studies with vertebrates also indicate that unequal distribution of apically localized proteins correlate with asymmetric cell fates (Alexandre et al., 2010; Bultje et al., 2009; Cayouette et al., 2001; Kosodo et al., 2004; Marthiens and French-Constant, 2009; Zigman et al., 2005). For example, in the developing zebrafish neural tube, time-lapse imaging demonstrated that unilateral segregation of the apical domain to one daughter cell, as judged by Par3-GFP, correlated with asymmetric cell divisions, in which the cell that inherited the apical domain was biased to differentiate as the neuron (Alexandre et al., 2010).

Our results raise the question how does the apical domain regulate Notch activity? Possibilities for direct and indirect mechanisms exist. For example  $\beta$ -catenin (Ctnnb1) is a well-characterized core component of apical junctions and known to regulate adhesion between neuroepithelia. It is also the key effector of canonical Wnt signaling. In zebrafish and frog retinal neuroepithelia, activation of the canonical Wnt signaling pathway drives progenitor cell proliferation and, through Notch, blocks neural differentiation (Agathocleous et al., 2009; Van Raay et al., 2005; Yamaguchi et al., 2005). Another key component associated with apical junctions is Par3. In the developing mouse cortex, Par3 levels were found to positively regulate Notch activity and overexpression of Par3 promoted symmetric proliferative divisions (Bultje et al., 2009). The apical protein Crumbs negatively regulates Notch activity in neuroepithelia (Ohata et al., 2011). Potentially, expansion of the apical domain either recruits activators of Notch signaling or dilutes the effective concentration of inhibitors.

In *Drosophila*, components of the Salvador-Warts-Hippo (SWH) signaling pathway are also associated with the apical domain and promote cell proliferation. In fact, recent studies showed that inhibition of the SWH pathway results in expansion of the apical domain and accumulation of signaling molecules at the apical cell surface, including Notch (Genevet et al., 2009; Hamaratoglu et al., 2009; Maitra et al., 2006; Yu et al., 2008). However, Notch activity in SWH pathway mutants was not upregulated, owing to the effects of the SWH pathway mutations on endocytosis and intracellular trafficking, which is required for Notch activation (Fortini and Bilder, 2009). Intriguingly, deletion of *Lgl* in the *Drosophila* eye disc, results in hyperproliferation that depends on the transcriptional co-activator Yorkie, a target of the SWH pathway (Grzeschik et al., 2010). Yorkie overexpression can also drive apical domain expansion (Genevet et al., 2009), but it is unclear whether this manipulation affects Notch signaling.

In summary, our analysis of the loss-of-function phenotype for *Lgl1* in retinal neuroepithelia has provided insight to the cell biological regulation of neurogenesis and the role of the apical domain as a signaling source capable of influencing cell cycle exit.

Analysis of interkinetic nuclear migration in wild-type and *lgl1* morphant embryos suggests that apical domain-associated signals cooperate with nuclear position acutely to control the selection of neurogenic progenitor cells. Other mechanisms, such as apical domain partitioning at cytokinesis, are also possible. Future studies will be important to probe further the nuances of how apical domain size is regulated and how polarized signals are transferred to and integrated within the nucleus to impact neurogenesis.

#### Acknowledgements

We thank Anitha Ponnuswami for assistance with construct generation, Pat Cliff for zebrafish husbandry and Clive Wells for assistance on TEM studies. We also thank Drs John Wallingford, Gretchen Dollar and Sergie Sokol for sharing reagents.

#### Funding

This project was supported by the National Institutes of Health [T32EY014536 to B.S.C., R01CA098161 and R01CA131047 to V.V., and R01EY014167 to B.A.L.], as well as by a National Eye Institute Core Facilities grant [P30EY001931] to the vision research community of the Medical College of Wisconsin. Deposited in PMC for release after 12 months.

#### Competing interests statement

The authors declare no competing financial interests.

#### Supplementary material

Supplementary material available online at <http://dev.biologists.org/lookup/suppl/doi:10.1242/dev.078097/-DC1>

#### References

- Afonso, C. and Henrique, D. (2006). PAR3 acts as a molecular organizer to define the apical domain of chick neuroepithelial cells. *J. Cell Sci.* **119**, 4293-4304.
- Agathocleous, M., Iordanova, I., Willardsen, M. I., Xue, X. Y., Vetter, M. L., Harris, W. A. and Moore, K. B. (2009). A directional Wnt/ $\beta$ -catenin-Sox2-proneural pathway regulates the transition from proliferation to differentiation in the *Xenopus* retina. *Development* **136**, 3289-3299.
- Albertson, R. and Doe, C. Q. (2003). Dlg, Scrib and Lgl regulate neuroblast cell size and mitotic spindle asymmetry. *Nat. Cell Biol.* **5**, 166-170.
- Alexandre, P., Reugels, A. M., Barker, D., Blanc, E. and Clarke, J. D. (2010). Neurons derive from the more apical daughter in asymmetric divisions in the zebrafish neural tube. *Nat. Neurosci.* **13**, 673-679.
- Baye, L. M. and Link, B. A. (2007). Interkinetic nuclear migration and the selection of neurogenic cell divisions during vertebrate retinogenesis. *J. Neurosci.* **27**, 10143-10152.
- Baye, L. M. and Link, B. A. (2008). Nuclear migration during retinal development. *Brain Res.* **1192**, 29-36.
- Berghmans, S., Murphey, R. D., Wienholds, E., Neubergh, D., Kutok, J. L., Fletcher, C. D., Morris, J. P., Liu, T. X., Schulte-Merker, S., Kanki, J. P. et al. (2005). tp53 mutant zebrafish develop malignant peripheral nerve sheath tumors. *Proc. Natl. Acad. Sci. USA* **102**, 407-412.
- Betschinger, J., Mechtler, K. and Knoblich, J. A. (2003). The Par complex directs asymmetric cell division by phosphorylating the cytoskeletal protein Lgl. *Nature* **422**, 326-330.
- Bilder, D., Li, M. and Perrimon, N. (2000). Cooperative regulation of cell polarity and growth by *Drosophila* tumor suppressors. *Science* **289**, 113-116.
- Bultje, R. S., Castaneda-Castellanos, D. R., Jan, L. Y., Jan, Y. N., Kriegstein, A. R. and Shi, S. H. (2009). Mammalian Par3 regulates progenitor cell asymmetric division via notch signaling in the developing neocortex. *Neuron* **63**, 189-202.
- Burkel, B. M., von Dassow, G. and Bement, W. M. (2007). Versatile fluorescent probes for actin filaments based on the actin-binding domain of utrophin. *Cell Motil. Cytoskel.* **64**, 822-832.
- Carmany-Rampey, A. and Moens, C. B. (2006). Modern mosaic analysis in the zebrafish. *Methods* **39**, 228-238.
- Cayouette, M., Whitmore, A., Jeffery, G. and Raff, M. (2001). Asymmetric segregation of Numb in retinal development and the influence of the pigmented epithelium. *J. Neurosci.* **21**, 5643-5651.
- Cisneros, E., Latasa, M. J., Garcia-Flores, M. and Frade, J. M. (2008). Instability of Notch1 and Delta1 mRNAs and reduced Notch activity in vertebrate neuroepithelial cells undergoing S-phase. *Mol. Cell. Neurosci.* **37**, 820-831.
- Clark, B. S., Winter, M., Cohen, A. R. and Link, B. A. (2011). Generation of Rab-based transgenic lines for in vivo studies of endosome biology in zebrafish. *Dev. Dyn.* **240**, 2452-2465.
- Coffman, C. R., Skoglund, P., Harris, W. A. and Kintner, C. R. (1993). Expression of an extracellular deletion of Xotch diverts cell fate in *Xenopus* embryos. *Cell* **73**, 659-671.



- Cohen, A. R., Gomes, F. L., Roysam, B. and Cayouette, M. (2010). Computational prediction of neural progenitor cell fates. *Nat. Methods* **7**, 213-218.
- Corbeil, D., Marzesco, A. M., Wilsch-Brauninger, M. and Huttner, W. B. (2010). The intriguing links between prominin-1 (CD133), cholesterol-based membrane microdomains, remodeling of apical plasma membrane protrusions, extracellular membrane particles, and (neuro)epithelial cell differentiation. *FEBS Lett.* **584**, 1659-1664.
- Cui, S., Otten, C., Rohr, S., Abdelilah-Seyfried, S. and Link, B. A. (2007). Analysis of aPKC $\lambda$  and aPKC $\zeta$  reveals multiple and redundant functions during vertebrate retinogenesis. *Mol. Cell. Neurosci.* **34**, 431-444.
- Del Bene, F., Wehman, A. M., Link, B. A. and Baier, H. (2008). Regulation of neurogenesis by interkinetic nuclear migration through an apical-basal notch gradient. *Cell* **134**, 1055-1065.
- Dollar, G. L., Weber, U., Mlodzik, M. and Sokol, S. Y. (2005). Regulation of Lethal giant larvae by Dishevelled. *Nature* **437**, 1376-1380.
- Fortini, M. E. and Bilder, D. (2009). Endocytic regulation of Notch signaling. *Curr. Opin. Genet. Dev.* **19**, 323-328.
- Ge, X., Frank, C. L., Calderon de Anda, F. and Tsai, L. H. (2010). Hook3 interacts with PCM1 to regulate pericentriolar material assembly and the timing of neurogenesis. *Neuron* **65**, 191-203.
- Genevet, A., Polesello, C., Blight, K., Robertson, F., Collinson, L. M., Pichaud, F. and Tapon, N. (2009). The Hippo pathway regulates apical-domain size independently of its growth-control function. *J. Cell Sci.* **122**, 2360-2370.
- Grzeschik, N. A., Amin, N., Secombe, J., Brumby, A. M. and Richardson, H. E. (2007). Abnormalities in cell proliferation and apico-basal cell polarity are separable in Drosophila lgl mutant clones in the developing eye. *Dev. Biol.* **311**, 106-123.
- Grzeschik, N. A., Parsons, L. M., Allott, M. L., Harvey, K. F. and Richardson, H. E. (2010). Lgl, aPKC, and Crumbs regulate the Salvador/Warts/Hippo pathway through two distinct mechanisms. *Curr. Biol.* **20**, 573-581.
- Haigo, S. L., Hildebrand, J. D., Harland, R. M. and Wallingford, J. B. (2003). Shroom induces apical constriction and is required for hinge-point formation during neural tube closure. *Curr. Biol.* **13**, 2125-2137.
- Hamaratoglu, F., Gajewski, K., Sansores-Garcia, L., Morrison, C., Tao, C. and Halder, G. (2009). The Hippo tumor-suppressor pathway regulates apical-domain size in parallel to tissue growth. *J. Cell Sci.* **122**, 2351-2359.
- Hava, D., Forster, U., Matsuda, M., Cui, S., Link, B. A., Eichhorst, J., Wiesner, B., Chitnis, A. and Abdelilah-Seyfried, S. (2009). Apical membrane maturation and cellular rosette formation during morphogenesis of the zebrafish lateral line. *J. Cell Sci.* **122**, 687-695.
- Hildebrand, J. D. (2005). Shroom regulates epithelial cell shape via the apical positioning of an actomyosin network. *J. Cell Sci.* **118**, 5191-5203.
- Horne-Badovinac, S., Lin, D., Waldron, S., Schwarz, M., Mbamalu, G., Pawson, T., Jan, Y., Stainier, D. Y. and Abdelilah-Seyfried, S. (2001). Positional cloning of *heart and soul* reveals multiple roles for PKC $\lambda$  in zebrafish organogenesis. *Curr. Biol.* **11**, 1492-1502.
- Hsu, Y. C. and Jensen, A. M. (2010). Multiple domains in the Crumbs Homolog 2a (Crb2a) protein are required for regulating rod photoreceptor size. *BMC Cell Biol.* **11**, 60.
- Hu, M. and Easter, S. S. (1999). Retinal neurogenesis: the formation of the initial central patch of postmitotic cells. *Dev. Biol.* **207**, 309-321.
- Hutterer, A., Betschinger, J., Petronczki, M. and Knoblich, J. A. (2004). Sequential roles of Cdc42, Par-6, aPKC, and Lgl in the establishment of epithelial polarity during Drosophila embryogenesis. *Dev. Cell* **6**, 845-854.
- Jensen, A. M. and Westerfield, M. (2004). Zebrafish *mosaic eyes* is a novel FERM protein required for retinal lamination and retinal pigmented epithelial tight junction formation. *Curr. Biol.* **14**, 711-717.
- Klezovitch, O., Fernandez, T. E., Tapscott, S. J. and Vasioukhin, V. (2004). Loss of cell polarity causes severe brain dysplasia in Lgl1 knockout mice. *Genes Dev.* **18**, 559-571.
- Kosodo, Y., Roper, K., Haubensack, W., Marzesco, A. M., Corbeil, D. and Huttner, W. B. (2004). Asymmetric distribution of the apical plasma membrane during neurogenic divisions of mammalian neuroepithelial cells. *EMBO J.* **23**, 2314-2324.
- Latasa, M. J., Cisneros, E. and Frade, J. M. (2009). Cell cycle control of Notch signaling and the functional regionalization of the neuroepithelium during vertebrate neurogenesis. *Int. J. Dev. Biol.* **53**, 895-908.
- Lee, C., Scherr, H. M. and Wallingford, J. B. (2007). Shroom family proteins regulate gamma-tubulin distribution and microtubule architecture during epithelial cell shape change. *Development* **134**, 1431-1441.
- Lee, C. Y., Robinson, K. J. and Doe, C. Q. (2006). Lgl, Pins and aPKC regulate neuroblast self-renewal versus differentiation. *Nature* **439**, 594-598.
- Lee, J. H. and Gleeson, J. G. (2010). The role of primary cilia in neuronal function. *Neurobiol. Dis.* **38**, 167-172.
- Leung, L., Klopfer, A. V., Grill, S. W., Harris, W. A. and Norden, C. (2011). Apical migration of nuclei during G2 is a prerequisite for all nuclear motion in zebrafish neuroepithelia. *Development* **138**, 5003-5013.
- Maitra, S., Kulikaskas, R. M., Gavilan, H. and Fehon, R. G. (2006). The tumor suppressors Merlin and Expanded function cooperatively to modulate receptor endocytosis and signaling. *Curr. Biol.* **16**, 702-709.
- Marthiens, V. and French-Constant, C. (2009). Adherens junction domains are split by asymmetric division of embryonic neural stem cells. *EMBO Rep.* **10**, 515-520.
- Masai, I., Lele, Z., Yamaguchi, M., Komori, A., Nakata, A., Nishiwaki, Y., Wada, H., Tanaka, H., Nojima, Y., Hammerschmidt, M. et al. (2003). N-cadherin mediates retinal lamination, maintenance of forebrain compartments and patterning of retinal neurites. *Development* **130**, 2479-2494.
- McMahon, C., Gestri, G., Wilson, S. W. and Link, B. A. (2009). Lmx1b is essential for survival of pericardial mesenchymal cells and influences Fgf-mediated retinal patterning in zebrafish. *Dev. Biol.* **332**, 287-298.
- Mechler, B. M., McGinnis, W. and Gehring, W. J. (1985). Molecular cloning of lethal(2)giant larvae, a recessive oncogene of Drosophila melanogaster. *EMBO J.* **4**, 1551-1557.
- Murciano, A., Zamora, J., Lopez-Sanchez, J. and Frade, J. M. (2002). Interkinetic nuclear movement may provide spatial clues to the regulation of neurogenesis. *Mol. Cell. Neurosci.* **21**, 285-300.
- Musch, A., Cohen, D., Yeaman, C., Nelson, W. J., Rodriguez-Boulant, E. and Brennwald, P. J. (2002). Mammalian homolog of Drosophila tumor suppressor lethal (2) giant larvae interacts with basolateral exocytic machinery in Madin-Darby canine kidney cells. *Mol. Biol. Cell* **13**, 158-168.
- Norden, C., Young, S., Link, B. A. and Harris, W. A. (2009). Actomyosin is the main driver of interkinetic nuclear migration in the retina. *Cell* **138**, 1195-1208.
- Ohata, S., Aoki, R., Kinoshita, S., Yamaguchi, M., Tsuruoka-Kinoshita, S., Tanaka, H., Wada, H., Watabe, S., Tsuboi, T., Masai, I. et al. (2011). Dual roles of Notch in regulation of apically restricted mitosis and apicobasal polarity of neuroepithelial cells. *Neuron* **69**, 215-230.
- Pauls, S., Geldmacher-Voss, B. and Campos-Ortega, J. A. (2001). A zebrafish histone variant H2A.F/Z and a transgenic H2A.F/Z:GFP fusion protein for in vivo studies of embryonic development. *Dev. Genes Evol.* **211**, 603-610.
- Peng, C. Y., Manning, L., Albertson, R. and Doe, C. Q. (2000). The tumour-suppressor genes lgl and dlg regulate basal protein targeting in Drosophila neuroblasts. *Nature* **408**, 596-600.
- Pfaffl, M. W., Horgan, G. W. and Dempfle, L. (2002). Relative expression software tool (REST) for group-wise comparison and statistical analysis of relative expression results in real-time PCR. *Nucleic Acids Res.* **30**, e36.
- Pittman, A. J., Law, M. Y. and Chien, C. B. (2008). Pathfinding in a large vertebrate axon tract: isotopic interactions guide retinotectal axons at multiple choice points. *Development* **135**, 2865-2871.
- Plant, P. J., Fawcett, J. P., Lin, D. C., Holdorf, A. D., Binns, K., Kulkarni, S. and Pawson, T. (2003). A polarity complex of mPar-6 and atypical PKC binds, phosphorylates and regulates mammalian Lgl. *Nat. Cell Biol.* **5**, 301-308.
- Poggi, L., Vitorino, M., Masai, I. and Harris, W. A. (2005). Influences on neural lineage and mode of division in the zebrafish retina in vivo. *J. Cell Biol.* **171**, 991-999.
- Reischauer, S., Levesque, M. P., Nusslein-Volhard, C. and Sonawane, M. (2009). Lgl2 executes its function as a tumor suppressor by regulating ErbB signaling in the zebrafish epidermis. *PLoS Genet.* **5**, e1000720.
- Robu, M. E., Larson, J. D., Nasevicius, A., Beiraghi, S., Brenner, C., Farber, S. A. and Ekker, S. C. (2007). p53 activation by knockdown technologies. *PLoS Genet.* **3**, e78.
- Rolls, M. M., Albertson, R., Shih, H. P., Lee, C. Y. and Doe, C. Q. (2003). Drosophila aPKC regulates cell polarity and cell proliferation in neuroblasts and epithelia. *J. Cell Biol.* **163**, 1089-1098.
- Salomoni, P. and Calegari, F. (2010). Cell cycle control of mammalian neural stem cells: putting a speed limit on G1. *Trends Cell Biol.* **20**, 233-243.
- Sawa, H. (2010). Specification of neurons through asymmetric cell divisions. *Curr. Opin. Neurobiol.* **20**, 44-49.
- Sawyer, J. M., Harrell, J. R., Shemer, G., Sullivan-Brown, J., Roh-Johnson, M. and Goldstein, B. (2009). Apical constriction: a cell shape change that can drive morphogenesis. *Dev. Biol.* **341**, 5-19.
- Schenk, J., Wilsch-Brauninger, M., Calegari, F. and Huttner, W. B. (2009). Myosin II is required for interkinetic nuclear migration of neural progenitors. *Proc. Natl. Acad. Sci. USA* **106**, 16487-16492.
- Sonawane, M., Carpio, Y., Geisler, R., Schwarz, H., Maischein, H.-M. and Nusslein-Volhard, C. (2005). Zebrafish penner/lethal giant larvae 2 functions in hemidesmosome formation, maintenance of cellular morphology and growth regulation in the developing basal epidermis. *Development* **132**, 3255-3265.
- Sonawane, M., Martin-Maischein, H., Schwarz, H. and Nusslein-Volhard, C. (2009). Lgl2 and E-cadherin act antagonistically to regulate hemidesmosome formation during epidermal development in zebrafish. *Development* **136**, 1231-1240.
- Strand, D., Unger, S., Corvi, R., Hartenstein, K., Schenkel, H., Kalmes, A., Merdes, G., Neumann, B., Krieg-Schneider, F., Coy, J. F. et al. (1995). A human homologue of the Drosophila tumour suppressor gene l(2)gl maps to 17p11.2-12 and codes for a cytoskeletal protein that associates with nonmuscle myosin II heavy chain. *Oncogene* **11**, 291-301.

- Tsai, J. W., Chen, Y., Kriegstein, A. R. and Vallee, R. B. (2005). LIS1 RNA interference blocks neural stem cell division, morphogenesis, and motility at multiple stages. *J. Cell Biol.* **170**, 935-945.
- Vaccari, T. and Bilder, D. (2005). The Drosophila tumor suppressor vps25 prevents nonautonomous overproliferation by regulating notch trafficking. *Dev. Cell* **9**, 687-698.
- Van Raay, T. J., Moore, K. B., Iordanova, I., Steele, M., Jamrich, M., Harris, W. A. and Vetter, M. L. (2005). Frizzled 5 signaling governs the neural potential of progenitors in the developing Xenopus retina. *Neuron* **46**, 23-36.
- Vasioukhin, V. (2006). Lethal giant puzzle of Lgl. *Dev. Neurosci.* **28**, 13-24.
- Wei, X. and Malicki, J. (2002). *nagie oko*, encoding a MAGUK-family protein, is essential for cellular patterning of the retina. *Nat. Genet.* **31**, 150-157.
- Willardsen, M. I. and Link, B. A. (2011). Cell biological regulation of division fate in vertebrate neuroepithelial cells. *Dev. Dyn.* **240**, 1865-1879.
- Xie, Z., Moy, L. Y., Sanada, K., Zhou, Y., Buchman, J. J. and Tsai, L. H. (2007). Cep120 and TACCs control interkinetic nuclear migration and the neural progenitor pool. *Neuron* **56**, 79-93.
- Yamaguchi, M., Tonou-Fujimori, N., Komori, A., Maeda, R., Nojima, Y., Li, H., Okamoto, H. and Masai, I. (2005). Histone deacetylase 1 regulates retinal neurogenesis in zebrafish by suppressing Wnt and Notch signaling pathways. *Development* **132**, 3027-3043.
- Yamaguchi, M., Imai, F., Tonou-Fujimori, N. and Masai, I. (2010). Mutations in N-cadherin and a Stardust homolog, Nagie oko, affect cell-cycle exit in zebrafish retina. *Mech. Dev.* **127**, 247-264.
- Yamanaka, T. and Ohno, S. (2008). Role of Lgl/Dlg/Scribble in the regulation of epithelial junction, polarity and growth. *Front. Biosci.* **13**, 6693-6707.
- Yamanaka, T., Horikoshi, Y., Sugiyama, Y., Ishiyama, C., Suzuki, A., Hirose, T., Iwamatsu, A., Shinohara, A. and Ohno, S. (2003). Mammalian Lgl forms a protein complex with PAR-6 and aPKC independently of PAR-3 to regulate epithelial cell polarity. *Curr. Biol.* **13**, 734-743.
- Yamanaka, T., Horikoshi, Y., Izumi, N., Suzuki, A., Mizuno, K. and Ohno, S. (2006). Lgl mediates apical domain disassembly by suppressing the PAR-3-aPKC-PAR-6 complex to orient apical membrane polarity. *J. Cell Sci.* **119**, 2107-2118.
- Yeo, S. Y., Kim, M., Kim, H. S., Huh, T. L. and Chitnis, A. B. (2007). Fluorescent protein expression driven by her4 regulatory elements reveals the spatiotemporal pattern of Notch signaling in the nervous system of zebrafish embryos. *Dev. Biol.* **301**, 555-567.
- Yu, J., Poulton, J., Huang, Y. C. and Deng, W. M. (2008). The hippo pathway promotes Notch signaling in regulation of cell differentiation, proliferation, and oocyte polarity. *PLoS ONE* **3**, e1761.
- Yu, J., Lei, K., Zhou, M., Craft, C. M., Xu, G., Xu, T., Zhuang, Y., Xu, R. and Han, M. (2011). KASH protein Syne-2/Nesprin-2 and SUN proteins SUN1/2 mediate nuclear migration during mammalian retinal development. *Hum. Mol. Genet.* **20**, 1061-1073.
- Zhang, X., Lei, K., Yuan, X., Wu, X., Zhuang, Y., Xu, T., Xu, R. and Han, M. (2009). SUN1/2 and Syne/Nesprin-1/2 complexes connect centrosome to the nucleus during neurogenesis and neuronal migration in mice. *Neuron* **64**, 173-187.
- Zigman, M., Cayouette, M., Charalambous, C., Schleiffer, A., Hoeller, O., Dunican, D., McCudden, C. R., Firnberg, N., Barres, B. A., Siderovski, D. P. et al. (2005). Mammalian inscuteable regulates spindle orientation and cell fate in the developing retina. *Neuron* **48**, 539-545.
